# Supplementary material for: Influence of age on histologic outcome of cervical intraepithelial neoplasia during observational management: results from large cohort, systematic review, meta-analysis
Source: PubMed Central journal article supplement (PMC5913272; doi:10.1038/s41598-018-24882-2), 2018-04-23

# **Influence of age on histologic outcome of cervical intraepithelial neoplasia during observational management: results from large cohort, systematic review, meta-analysis**

Christine Bekos<sup>1</sup>, Richard Schwameis<sup>1</sup>, Georg Heinze<sup>2</sup>, Marina Gärner<sup>1</sup>, Christoph Grimm<sup>1</sup>, Elmar Joura<sup>1,4</sup>, Reinhard Horvat<sup>3</sup>, Stephan Polterauer<sup>1,4,\*</sup>, Mariella Polterauer<sup>1</sup>

1. Medical University of Vienna, Comprehensive Cancer Center, Department of Obstetrics and Gynecology, Division of General Gynecology and Gynecologic Oncology
2. Center for Medical Statistics, Informatics and Intelligent Systems, Medical University of Vienna
3. Medical University of Vienna, Department of Pathology
4. Karl Landsteiner Institute for General Gynecology and Experimental Gynecologic Oncology, Austria

## **Corresponding author\*:**

Stephan Polterauer MD

Associate Professor, Department of Obstetrics and Gynecology, Medical University Vienna  
Währinger Gürtel 18-20, A-1090 Vienna, Austria,

Phone: +43 1 40400 29620, FAX: +43 1 40400 29110

[stephan.polterauer@meduniwien.ac.at](mailto:stephan.polterauer@meduniwien.ac.at)

## Supplemental material

**Table S1.** References of included studies, data from the current report were included into all analyses

| Author, Date          | Population | N   | Age, median (range) | Outcome (Regression) | Analysis                  | Median follow up (months) |
|-----------------------|------------|-----|---------------------|----------------------|---------------------------|---------------------------|
| Chan, 2003 [14]       |            |     | 29 (19-55)          |                      | prospective               | 6                         |
|                       | CIN II     | 55  |                     | 58%                  |                           |                           |
|                       | CIN III    | 38  |                     | 47%                  |                           |                           |
| Fuchs, 2007 [15]      | CIN I-II   | 36  | ≤21                 | 38.9%                | retrospective             | 12.6                      |
| Moore, 2011 [16]      |            |     | 29.8                |                      | prospective               | 12                        |
|                       | CIN I      | 143 |                     | 69.9%                |                           |                           |
|                       | CIN II     | 63  |                     | 76.2%                |                           |                           |
| Hogewoning, 2003 [17] | CIN I-III  | 125 | 34.6 (19.1-54.7)    | 44%                  | randomized clinical trial | 15.2                      |
| McAllum, 2011 [18]    | CIN II     | 157 | 20.9                | 61.8%                | retrospective             | 8                         |
| Moore, 2007 [19]      | CIN II     | 355 | 19.0                | 56.1%                | retrospective             | 18                        |
| Moscicki, 2010 [10]   | CIN II     | 95  | 20.4                | 68.4%                | prospective               | 36                        |

**Table S2.** Pooled analysis of studies reporting age- dependent regression rates of CIN

| Rate of regression in women <25 years |                     |     |      |          |          |
|---------------------------------------|---------------------|-----|------|----------|----------|
| Outcome parameter                     | Author              | N   | %    | Lower CI | Upper CI |
| Regression                            | Fuchs, 2007 [15]    | 36  | 38.9 | 24.800   | 55.100   |
| Regression                            | McAllum, 2011 [18]  | 157 | 61.8 | 54.000   | 69.000   |
| Regression                            | Moore, 2007 [19]    | 355 | 56.1 | 50.900   | 61.100   |
| Regression                            | Moscicki, 2010 [10] | 95  | 68.4 | 58.500   | 76.900   |
| Regression                            | Bekos, 2016         | 141 | 44.7 | 36.700   | 52.900   |
| Regression                            | ***POOLED***        | 784 | 54.9 | 45.000   | 64.500   |

| Rate of regression in women <30 years |                       |      |      |          |          |
|---------------------------------------|-----------------------|------|------|----------|----------|
| Outcome parameter                     | Author                | N    | %    | Lower CI | Upper CI |
| Regression                            | Chan, 2003 [14]       | 47   | 44.7 | 31.400   | 58.800   |
| Regression                            | Fuchs, 2007 [15]      | 36   | 38.9 | 24.800   | 55.100   |
| Regression                            | Hogewoning, 2003 [17] | 30   | 30.0 | 16.700   | 47.900   |
| Regression                            | McAllum, 2011 [18]    | 157  | 61.8 | 54.000   | 69.000   |
| Regression                            | Moore, 2007 [19]      | 355  | 56.1 | 50.900   | 61.100   |
| Regression                            | Moscicki, 2010 [10]   | 95   | 68.4 | 58.500   | 76.900   |
| Regression                            | Bekos, 2016           | 319  | 38.6 | 33.400   | 44.000   |
| Regression                            | ***POOLED***          | 1039 | 49.4 | 39.100   | 59.700   |

| Rate of regression in women <35 years |        |   |   |          |          |
|---------------------------------------|--------|---|---|----------|----------|
| Outcome parameter                     | Author | N | % | Lower CI | Upper CI |

|            |                       |      |      |        |        |
|------------|-----------------------|------|------|--------|--------|
| Regression | Chan, 2003 [14]       | 47   | 44.7 | 31.400 | 58.800 |
| Regression | Fuchs, 2007 [15]      | 36   | 38.9 | 24.800 | 55.100 |
| Regression | Hogewoning, 2003 [17] | 65   | 32.3 | 22.200 | 44.400 |
| Regression | McAllum, 2011 [18]    | 157  | 61.8 | 54.000 | 69.000 |
| Regression | Moore, 2007 [19]      | 355  | 56.1 | 50.900 | 61.100 |
| Regression | Moscicki, 2010 [10]   | 95   | 68.4 | 58.500 | 76.900 |
| Regression | Bekos, 2016           | 471  | 36.1 | 31.900 | 40.500 |
| Regression | ***POOLED***          | 1226 | 48.7 | 38.200 | 59.400 |

| <b>Rate of regression in women ≥35 years</b> |                       |          |          |                 |                 |
|----------------------------------------------|-----------------------|----------|----------|-----------------|-----------------|
| <b>Outcome parameter</b>                     | <b>Author</b>         | <b>N</b> | <b>%</b> | <b>Lower CI</b> | <b>Upper CI</b> |
| Regression                                   | Hogewoning, 2003 [17] | 33       | 33.3     | 19.800          | 50.400          |
| Regression                                   | Bekos, 2016           | 312      | 26.0     | 21.400          | 31.100          |
| Regression                                   | ***POOLED***          | 345      | 26.7     | 22.300          | 31.600          |

N, number; CI confidence interval;

**Table S3.** Pooled analysis of studies reporting age- dependent persistence rates of CIN

| <b>Rate of persistence in women &lt;25 years</b> |                    |          |          |                 |                 |
|--------------------------------------------------|--------------------|----------|----------|-----------------|-----------------|
| <b>Outcome parameter</b>                         | <b>Author</b>      | <b>N</b> | <b>%</b> | <b>Lower CI</b> | <b>Upper CI</b> |
| Persistence                                      | Fuchs, 2007 [15]   | 36       | 8.3      | 2.9000          | 21.800          |
| Persistence                                      | Ho, 2011 [16]      | 66       | 42.4     | 31.200          | 54.400          |
| Persistence                                      | McAllum, 2011 [18] | 157      | 38.2     | 31.000          | 46.000          |
| Persistence                                      | Moore, 2007 [19]   | 355      | 34.9     | 30.200          | 40.000          |
| Persistence                                      | Bekos, 2016        | 141      | 44.7     | 36.700          | 52.900          |
| Persistence                                      | ***POOLED***       | 755      | 33.5     | 21.800          | 47.700          |

| <b>Rate of persistence in women &lt;30 years</b> |                    |          |          |                 |                 |
|--------------------------------------------------|--------------------|----------|----------|-----------------|-----------------|
| <b>Outcome parameter</b>                         | <b>Author</b>      | <b>N</b> | <b>%</b> | <b>Lower CI</b> | <b>Upper CI</b> |
| Persistence                                      | Fuchs, 2007 [15]   | 36       | 8.3      | 2.9000          | 21.800          |
| Persistence                                      | Ho, 2011 [16]      | 66       | 42.4     | 31.200          | 54.400          |
| Persistence                                      | McAllum, 2011 [18] | 157      | 38.2     | 31.000          | 46.000          |
| Persistence                                      | Moore, 2007 [19]   | 355      | 34.9     | 30.200          | 40.000          |
| Persistence                                      | Bekos, 2016        | 319      | 49.2     | 43.800          | 54.700          |
| Persistence                                      | ***POOLED***       | 933      | 34.3     | 21.500          | 49.800          |

| <b>Rate of persistence in women &lt;35 years</b> |                    |          |          |                 |                 |
|--------------------------------------------------|--------------------|----------|----------|-----------------|-----------------|
| <b>Outcome parameter</b>                         | <b>Author</b>      | <b>N</b> | <b>%</b> | <b>Lower CI</b> | <b>Upper CI</b> |
| Persistence                                      | Fuchs, 2007 [15]   | 36       | 8.3      | 2.9000          | 21.800          |
| Persistence                                      | Ho, 2011 [16]      | 148      | 36.5     | 29.200          | 44.500          |
| Persistence                                      | McAllum, 2011 [18] | 157      | 38.2     | 31.000          | 46.000          |
| Persistence                                      | Moore, 2007 [19]   | 355      | 34.9     | 30.200          | 40.000          |
| Persistence                                      | Bekos, 2016        | 471      | 50.1     | 45.600          | 54.600          |
| Persistence                                      | ***POOLED***       | 1167     | 33.5     | 21.200          | 48.500          |

| <b>Rate of persistence in women ≥35 years</b> |               |          |          |                 |                 |
|-----------------------------------------------|---------------|----------|----------|-----------------|-----------------|
| <b>Outcome parameter</b>                      | <b>Author</b> | <b>N</b> | <b>%</b> | <b>Lower CI</b> | <b>Upper CI</b> |
| Persistence                                   | Ho, 2011 [16] | 58       | 31.0     | 20.600          | 43.800          |
| Persistence                                   | Bekos, 2016   | 312      | 55.4     | 49.900          | 60.900          |
| Persistence                                   | ***POOLED***  | 370      | 43.6     | 22.200          | 67.700          |

N, number; CI confidence interval;

**Table S4.** Pooled analysis of studies reporting age- dependent progression rates of CIN

| <b>Rate of progression in women &lt;25 years</b> |                     |          |          |                 |                 |
|--------------------------------------------------|---------------------|----------|----------|-----------------|-----------------|
| <b>Outcome parameter</b>                         | <b>Author</b>       | <b>N</b> | <b>%</b> | <b>Lower CI</b> | <b>Upper CI</b> |
| Progression                                      | Moore, 2007 [19]    | 355      | 14.1     | 10.800          | 18.100          |
| Progression                                      | Moscicki, 2010 [10] | 95       | 14.7     | 9.0000          | 23.200          |
| Progression                                      | Bekos, 2016         | 141      | 10.6     | 6.6000          | 16.800          |
| Progression                                      | ***POOLED***        | 591      | 13.4     | 10.800          | 16.400          |

| <b>Rate of progression in women &lt;30 years</b> |                     |          |          |                 |                 |
|--------------------------------------------------|---------------------|----------|----------|-----------------|-----------------|
| <b>Outcome parameter</b>                         | <b>Author</b>       | <b>N</b> | <b>%</b> | <b>Lower CI</b> | <b>Upper CI</b> |
| Progression                                      | Moore, 2007 [19]    | 355      | 14.1     | 10.800          | 18.100          |
| Progression                                      | Moscicki, 2010 [10] | 95       | 14.7     | 9.0000          | 23.200          |
| Progression                                      | Bekos, 2016         | 319      | 12.2     | 9.1000          | 16.300          |
| Progression                                      | ***POOLED***        | 769      | 13.4     | 11.200          | 16.000          |

| <b>Rate of progression in women &lt;35 years</b> |                     |          |          |                 |                 |
|--------------------------------------------------|---------------------|----------|----------|-----------------|-----------------|
| <b>Outcome parameter</b>                         | <b>Author</b>       | <b>N</b> | <b>%</b> | <b>Lower CI</b> | <b>Upper CI</b> |
| Progression                                      | Moore, 2007 [19]    | 355      | 14.1     | 10.800          | 18.100          |
| Progression                                      | Moscicki, 2010 [10] | 95       | 14.7     | 9.0000          | 23.200          |
| Progression                                      | Bekos, 2016         | 471      | 13.8     | 11.000          | 17.200          |
| Progression                                      | ***POOLED***        | 921      | 14.0     | 11.900          | 16.400          |

| <b>Rate of progression in women ≥35 years</b> |               |          |          |                 |                 |
|-----------------------------------------------|---------------|----------|----------|-----------------|-----------------|
| <b>Outcome parameter</b>                      | <b>Author</b> | <b>N</b> | <b>%</b> | <b>Lower CI</b> | <b>Upper CI</b> |
| Progression                                   | Bekos, 2016   | 312      | 18.6     | 14.700          | 23.300          |
| Progression                                   | ***POOLED***  | 312      | 18.6     | 14.600          | 23.300          |

N, number; CI confidence interval;

**Table S5.** Cochrane risk of bias assessment tool for study Moscicki AB et al., 2010;

| Domain                     | Support for judgement | Review authors' judgement |
|----------------------------|-----------------------|---------------------------|
| <i>Selection bias</i>      |                       |                           |
| Random sequence generation | does not apply        | does not apply            |
| Allocation concealment     | does not apply        | does not apply            |

|                                        |                                                                                                                                                                                                                                         |                  |
|----------------------------------------|-----------------------------------------------------------------------------------------------------------------------------------------------------------------------------------------------------------------------------------------|------------------|
| <i>Performance bias</i>                |                                                                                                                                                                                                                                         |                  |
| Blinding of participants and personnel | Blinding of participants: not possible as participants are not blind for their age.<br>Blinding of personnel: personnel cannot be blind to age of participants.                                                                         | Low risk         |
| <i>Detection bias</i>                  |                                                                                                                                                                                                                                         |                  |
| Blinding of outcome assessment         | Histological specimens were reviewed independently by 2 (CIN2) or 3 (CIN3) separate pathologist. It is unclear whether pathologists were blinded to age of patients.                                                                    | Low risk         |
| <i>Attrition bias</i>                  |                                                                                                                                                                                                                                         |                  |
| Incomplete outcome data                | Heterogenous outcome data because of mean (SD) length of follow up of 27.4 (SD 11.6) with a range of 3.8 to 46.8 months. 68% of patients had an exit biopsy. The remaining patients either refused or did not come for the final visit. | <i>High risk</i> |
| <i>Reporting bias</i>                  |                                                                                                                                                                                                                                         |                  |
| Selective reporting                    | Reported outcome was due to histological diagnosis of cervical biopsy. Progression and regression are reported.                                                                                                                         | <i>Low risk</i>  |
| <i>Other bias</i>                      |                                                                                                                                                                                                                                         |                  |
| Other sources of bias                  | Inclusion criteria: 13-24 years, cervical cytology showing ASCUS, LSIL or HSIL, CIN 2;<br><br>Exclusion criteria: previous treatment of CIN, immunosuppression, pregnancy                                                               | <i>Low risk</i>  |

**Table S6. Cochrane risk of bias assessment tool for study Ho G et al., 2011;**

| Domain                     | Support for judgement | Review authors' judgement |
|----------------------------|-----------------------|---------------------------|
| <i>Selection bias</i>      |                       |                           |
| Random sequence generation | does not apply        | does not apply            |
| Allocation concealment     | does not apply        | does not apply            |

|                                        |                                                                                                                                                                      |                 |
|----------------------------------------|----------------------------------------------------------------------------------------------------------------------------------------------------------------------|-----------------|
| <i>Performance bias</i>                |                                                                                                                                                                      |                 |
| Blinding of participants and personnel | Blinding of participants: not possible as participants are not blind for their age.<br>Blinding of personnel: pathologists were blinded to age of participants.      | Low risk        |
| <i>Detection bias</i>                  |                                                                                                                                                                      |                 |
| Blinding of outcome assessment         | Histological specimens were reviewed independently by 2 separate pathologists, who were blinded to the paired biopsies.                                              | Low risk        |
| <i>Attrition bias</i>                  |                                                                                                                                                                      |                 |
| Incomplete outcome data                | Homogenous outcome data: 12 month follow up.                                                                                                                         | <i>Low risk</i> |
| <i>Reporting bias</i>                  |                                                                                                                                                                      |                 |
| Selective reporting                    | Reported outcome was due to histological diagnosis of cervical biopsy. Regression, persistence and progression are reported.                                         | <i>Low risk</i> |
| <i>Other bias</i>                      |                                                                                                                                                                      |                 |
| Other sources of bias                  | Inclusion criteria: age >18 years, CIN 1 and 2, no prior CIN diagnosis or treatment, satisfactory colposcopy, not pregnant, recruitment 4 months after CIN diagnosis | <i>Low risk</i> |

**Table S7. Cochrane risk of bias assessment tool for study Chan JK et al., 2003;**

| Domain                                 | Support for judgement                                                                                                                                           | Review authors' judgement |
|----------------------------------------|-----------------------------------------------------------------------------------------------------------------------------------------------------------------|---------------------------|
| <i>Selection bias</i>                  |                                                                                                                                                                 |                           |
| Random sequence generation             | does not apply                                                                                                                                                  | does not apply            |
| Allocation concealment                 | does not apply                                                                                                                                                  | does not apply            |
| <i>Performance bias</i>                |                                                                                                                                                                 |                           |
| Blinding of participants and personnel | Blinding of participants: not possible as participants are not blind for their age.<br>Blinding of personnel: personnel cannot be blind to age of participants. | High risk                 |
| <i>Detection bias</i>                  |                                                                                                                                                                 |                           |
| Blinding of outcome assessment         | Histological specimens were reviewed                                                                                                                            | Low risk                  |

|                         |                                                                                                                                                                              |                  |
|-------------------------|------------------------------------------------------------------------------------------------------------------------------------------------------------------------------|------------------|
|                         | independently by 2 separate pathologists. It is unclear whether pathologists were blinded to age of patients.                                                                |                  |
| <i>Attrition bias</i>   |                                                                                                                                                                              |                  |
| Incomplete outcome data | Homogenous outcome data: 6 month follow up.                                                                                                                                  | <i>High risk</i> |
| <i>Reporting bias</i>   |                                                                                                                                                                              |                  |
| Selective reporting     | Reported outcome was due to histological diagnosis of cervical biopsy. Only Regression is reported. All patients with persistent CIN 3 or Progression to CIN3 were excluded. | <i>High risk</i> |
| <i>Other bias</i>       |                                                                                                                                                                              |                  |
| Other sources of bias   | Inclusion criteria: age >17 years, CIN 2 and 3, negative endocervical curettage;                                                                                             | <i>Low risk</i>  |

**Table S8. Cochrane risk of bias assessment tool for study McAllum B et al., 2011;**

| Domain                                 | Support for judgement                                                                                                                                           | Review authors' judgement |
|----------------------------------------|-----------------------------------------------------------------------------------------------------------------------------------------------------------------|---------------------------|
| <i>Selection bias</i>                  |                                                                                                                                                                 |                           |
| Random sequence generation             | does not apply                                                                                                                                                  | does not apply            |
| Allocation concealment                 | does not apply                                                                                                                                                  | does not apply            |
| <i>Performance bias</i>                |                                                                                                                                                                 |                           |
| Blinding of participants and personnel | Blinding of participants: not possible as participants are not blind for their age.<br>Blinding of personnel: personnel cannot be blind to age of participants. | High risk                 |
| <i>Detection bias</i>                  |                                                                                                                                                                 |                           |
| Blinding of outcome assessment         | Histological specimens were reported by pathologic services at each of the 3 participating colposcopy clinics.                                                  | High risk                 |
| <i>Attrition bias</i>                  |                                                                                                                                                                 |                           |
| Incomplete outcome data                | Heterogenous outcome data were reported at 4-9, 10-15, 16-20 and 21-24month intervals.                                                                          | <i>High risk</i>          |
| <i>Reporting bias</i>                  |                                                                                                                                                                 |                           |
| Selective reporting                    | Reported outcome was due to histological diagnosis of cervical biopsy. Regression,                                                                              | <i>Low risk</i>           |

|                       |                                           |                 |
|-----------------------|-------------------------------------------|-----------------|
|                       | persistence and progression are reported. |                 |
| <i>Other bias</i>     |                                           |                 |
| Other sources of bias | Inclusion criteria: age <25 years, CIN 2; | <i>Low risk</i> |

**Table S9. Cochrane risk of bias assessment tool for study Hogewoning C et al., 2003;**

| Domain                                 | Support for judgement                                                                                                                                                                                                                                                                                                  | Review authors' judgement |
|----------------------------------------|------------------------------------------------------------------------------------------------------------------------------------------------------------------------------------------------------------------------------------------------------------------------------------------------------------------------|---------------------------|
| <i>Selection bias</i>                  |                                                                                                                                                                                                                                                                                                                        |                           |
| Random sequence generation             | does not apply                                                                                                                                                                                                                                                                                                         | does not apply            |
| Allocation concealment                 | does not apply                                                                                                                                                                                                                                                                                                         | does not apply            |
| <i>Performance bias</i>                |                                                                                                                                                                                                                                                                                                                        |                           |
| Blinding of participants and personnel | Blinding of participants: not possible as participants are not blind for their age.<br>Blinding of personnel: colposcopic findings were documented by photographs. These photographs were reviewed by an experienced colposcopist blinded of any clinical data. In case of discrepancy a consensus diagnosis was made. | Low risk                  |
| <i>Detection bias</i>                  |                                                                                                                                                                                                                                                                                                                        |                           |
| Blinding of outcome assessment         | Colposcopic findings were documented by photographs. These photographs were reviewed by an experienced colposcopist blinded of any clinical data. In case of discrepancy a consensus diagnosis was made.                                                                                                               | Low risk                  |
| <i>Attrition bias</i>                  |                                                                                                                                                                                                                                                                                                                        |                           |
| Incomplete outcome data                | Heterogenous outcome data: median follow up time of 15.2 (range 3.0-85.4)                                                                                                                                                                                                                                              | <i>High risk</i>          |
| <i>Reporting bias</i>                  |                                                                                                                                                                                                                                                                                                                        |                           |
| Selective reporting                    | Reported outcome was due to histological diagnosis of cervical biopsy. Regression, persistence and progression                                                                                                                                                                                                         | <i>Low risk</i>           |



|                       |                                                 |                 |
|-----------------------|-------------------------------------------------|-----------------|
|                       | are reported.                                   |                 |
| <i>Other bias</i>     |                                                 |                 |
| Other sources of bias | Inclusion criteria: CIN 1-3, no prior treatment | <i>Low risk</i> |

**Table S10. Cochrane risk of bias assessment tool for study Fuchs K et al., 2007;**

| Domain                                 | Support for judgement                                                                                                                                           | Review authors' judgement |
|----------------------------------------|-----------------------------------------------------------------------------------------------------------------------------------------------------------------|---------------------------|
| <i>Selection bias</i>                  |                                                                                                                                                                 |                           |
| Random sequence generation             | does not apply                                                                                                                                                  | does not apply            |
| Allocation concealment                 | does not apply                                                                                                                                                  | does not apply            |
| <i>Performance bias</i>                |                                                                                                                                                                 |                           |
| Blinding of participants and personnel | Blinding of participants: not possible as participants are not blind for their age.<br>Blinding of personnel: personnel cannot be blind to age of participants. | High risk                 |
| <i>Detection bias</i>                  |                                                                                                                                                                 |                           |
| Blinding of outcome assessment         | Histologic specimens were evaluated by the local hospital's pathologists. No information about blinded specimens.                                               | High risk                 |
| <i>Attrition bias</i>                  |                                                                                                                                                                 |                           |
| Incomplete outcome data                | Outcome data: follow up time of 4-6 months                                                                                                                      | <i>High risk</i>          |
| <i>Reporting bias</i>                  |                                                                                                                                                                 |                           |
| Selective reporting                    | Reported outcome was due to histological diagnosis of cervical biopsy. Regression, persistence and progression are reported.                                    | <i>Low risk</i>           |
| <i>Other bias</i>                      |                                                                                                                                                                 |                           |
| Other sources of bias                  | Inclusion criteria: age <21 years, CIN 1 and 2                                                                                                                  | <i>Low risk</i>           |

**Table S11. Cochrane risk of bias assessment tool for study Moore K al., 2007;**

| Domain                                 | Support for judgement                     | Review authors' judgement |
|----------------------------------------|-------------------------------------------|---------------------------|
| <i>Selection bias</i>                  |                                           |                           |
| Random sequence generation             | does not apply                            | does not apply            |
| Allocation concealment                 | does not apply                            | does not apply            |
| <i>Performance bias</i>                |                                           |                           |
| Blinding of participants and personnel | Blinding of participants: not possible as | Low risk                  |

|                                |                                                                                                                              |                 |
|--------------------------------|------------------------------------------------------------------------------------------------------------------------------|-----------------|
|                                | participants are not blind for their age.<br>Blinding of personnel: personnel cannot be blind to age of participants.        |                 |
| <i>Detection bias</i>          |                                                                                                                              |                 |
| Blinding of outcome assessment | No information about blinded outcome assessment.                                                                             | High risk       |
| <i>Attrition bias</i>          |                                                                                                                              |                 |
| Incomplete outcome data        | Outcome data: median follow up time of 18 months, patients were seen every 4-6 months                                        | <i>Low risk</i> |
| <i>Reporting bias</i>          |                                                                                                                              |                 |
| Selective reporting            | Reported outcome was due to histological diagnosis of cervical biopsy. Regression, persistence and progression are reported. | <i>Low risk</i> |
| <i>Other bias</i>              |                                                                                                                              |                 |
| Other sources of bias          | Inclusion criteria: age <21 years, CIN 1 and 2                                                                               | <i>Low risk</i> |

**Table S12. Risk of bias summary table**

| Study                            | Attrition bias (high if length of follow-up <12 months, low if ≥12 months, ? if no statement on length of follow-up found) | Selective reporting (high/low/?) | Detection bias (high/low/?) |
|----------------------------------|----------------------------------------------------------------------------------------------------------------------------|----------------------------------|-----------------------------|
| <b>Moscicki AB et al., 2010</b>  | High risk                                                                                                                  | Low risk                         | Low risk                    |
| <b>Ho G et al., 2011</b>         | Low risk                                                                                                                   | Low risk                         | Low risk                    |
| <b>Chan JK et al., 2003</b>      | High risk                                                                                                                  | High risk                        | Low Risk                    |
| <b>McAllum B et al., 2011</b>    | High risk                                                                                                                  | Low risk                         | High Risk                   |
| <b>Hogewoning C et al., 2003</b> | High risk                                                                                                                  | Low Risk                         | Low Risk                    |
| <b>Fuchs K et al., 2007</b>      | High risk                                                                                                                  | Low risk                         | High risk                   |
| <b>Moore K al., 2007</b>         | Low risk                                                                                                                   | Low risk                         | High risk                   |

**Figure S1.** A positive correlation was found between sample size and regression rates, indicating the absence of presence of publication bias (regression coefficient +7.7% per doubling of sample size, one-sided p=0.997).

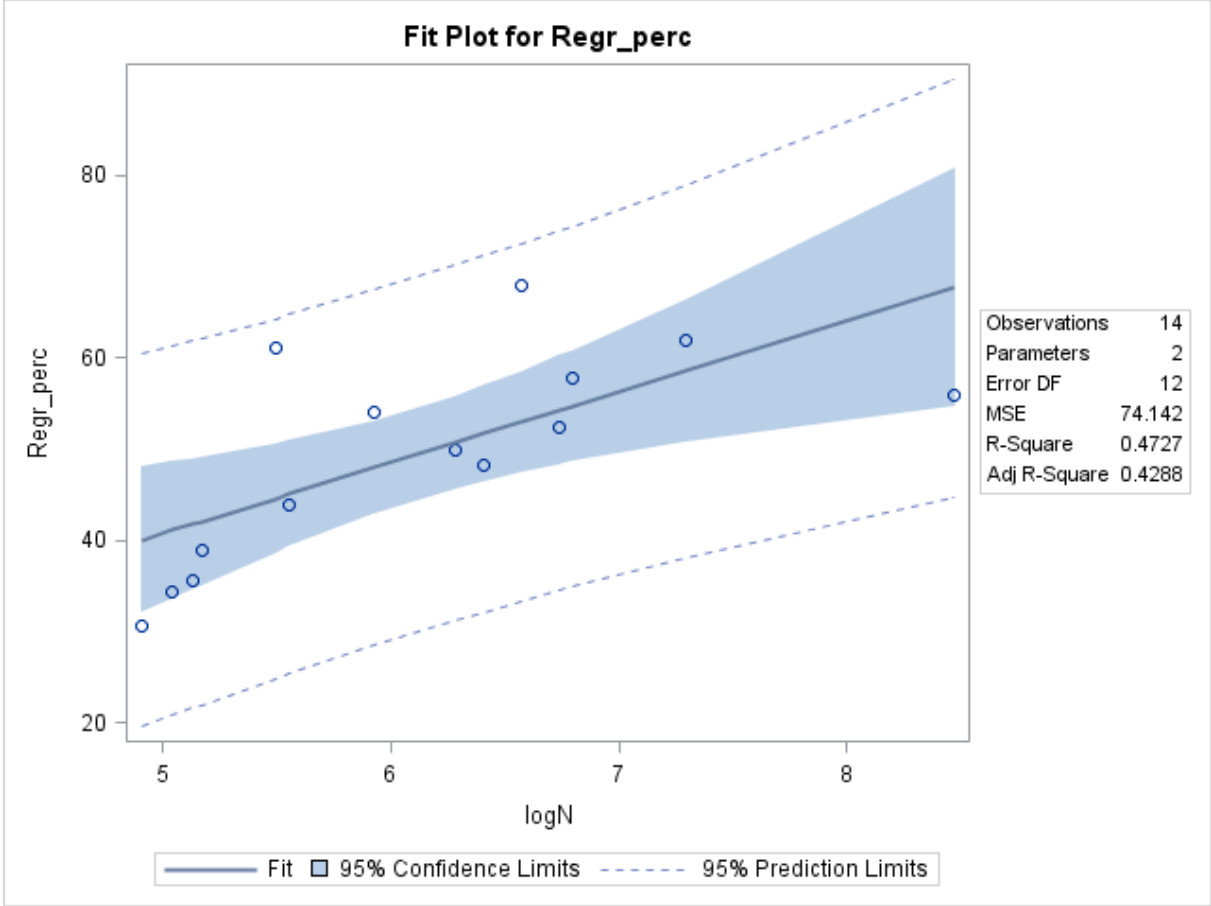

**Figure S2.** Persistence increased by 4.6% per doubling of sample size (P=0.906).

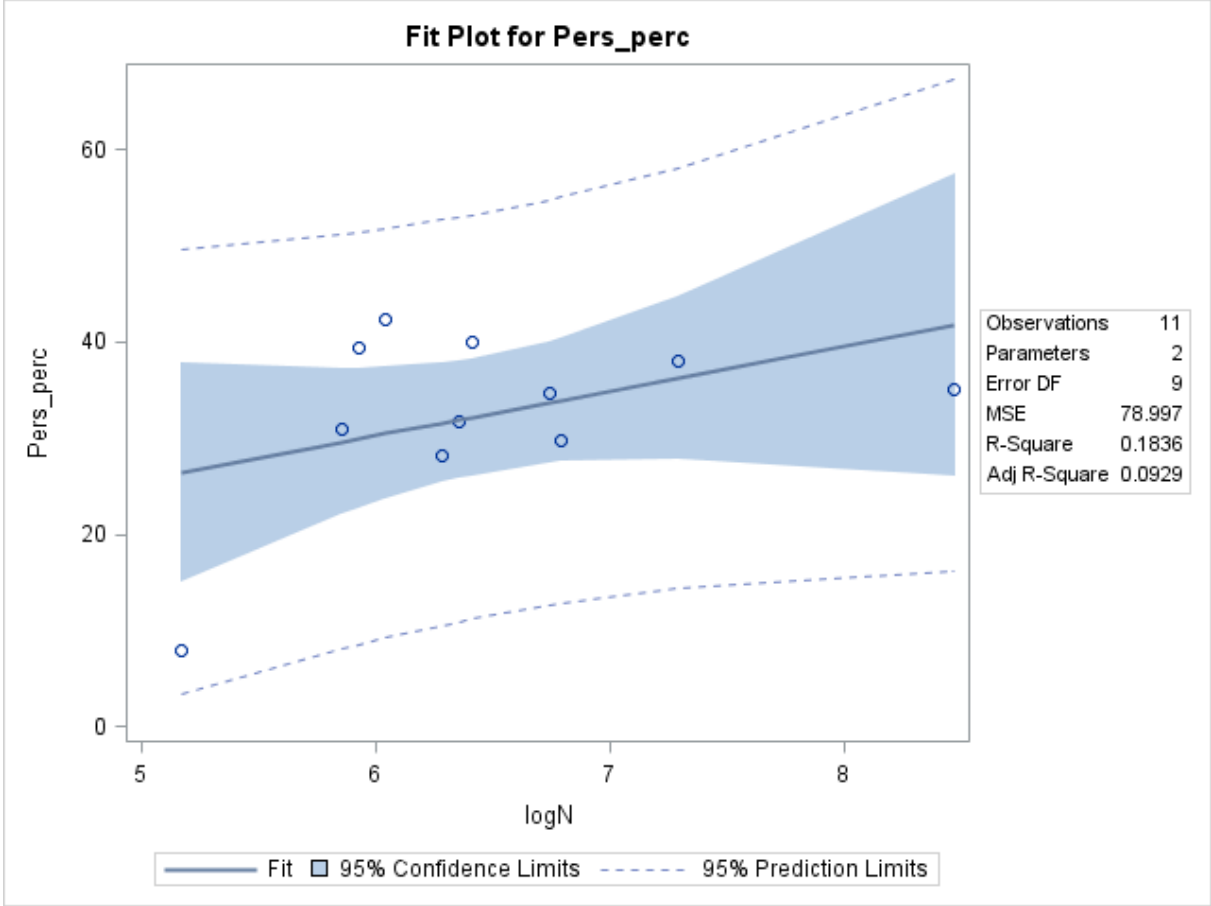

**Figure S3.** Progression rates were not significantly associated with sample size (+0.73% per doubling of sample size,  $p=0.389$ ).

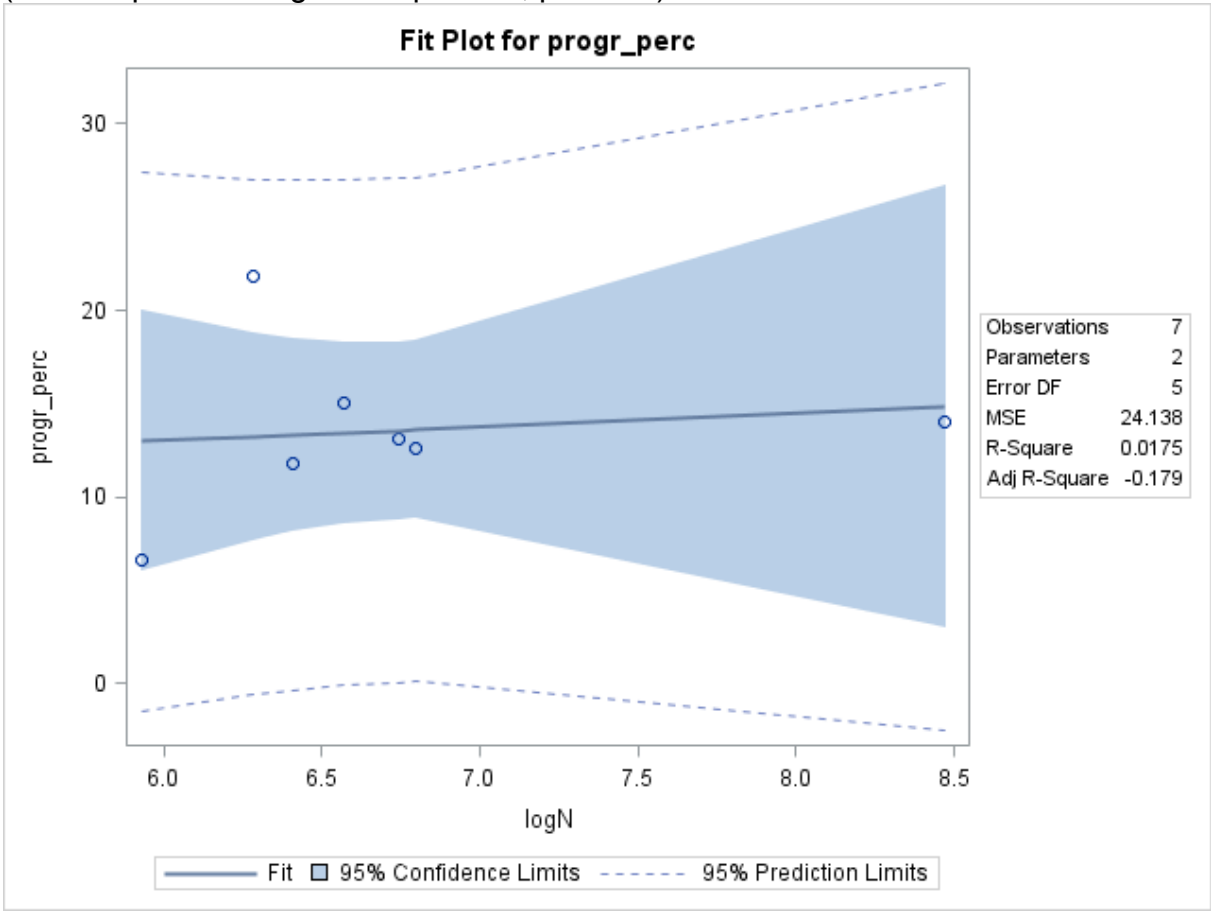

Supplement: 41598_2018_24882_MOESM1_ESM.pdf [file 41598_2018_24882_MOESM1_ESM.pdf]
